# Supplementary material
Source: PubMed Central journal article supplement (PMC3681885)
Supplement: NIHMS453241-supplement-10286_2013_190_MOESM1_ESM.pdf [file NIHMS453241-supplement-10286_2013_190_MOESM1_ESM.pdf]

## **Gynecological and Menstrual Disorders in Women with Vasovagal Syncope.**

### ***Clinical Autonomic Research***

Prasuna Muppa MBBS<sup>1</sup>, Robert S Sheldon MD PhD<sup>2</sup>, Maureen McRae RN<sup>2</sup>, Nancy R Keller PhD<sup>1</sup>, Deborah Ritchie MN RN<sup>2</sup>, Andrew D Krahn MD<sup>3</sup>, Carlos A Morillo MD<sup>4</sup>, Teresa Kus MD PhD<sup>5</sup>, Mario Talajic MD<sup>5</sup>, and Satish R. Raj MD MSCI<sup>1,6,\*</sup>

1. Autonomic Dysfunction Center, Division of Clinical Pharmacology, Department of Medicine, Vanderbilt University School of Medicine, Nashville, TN
2. Libin Cardiovascular Institute of Alberta, University of Calgary, Calgary, AB, Canada
3. Division of Cardiology, University of British Columbia, Vancouver, BC, Canada
4. Cardiology Division, McMaster University, Hamilton Health Sciences Center, Hamilton, ON, Canada
5. Division of Cardiology, Université de Montreal, Montreal, Québec, Canada
6. Department of Pharmacology, Vanderbilt University School of Medicine, Nashville, TN

### **\*Corresponding Author & Address for Reprints:**

Satish R. Raj MD MSCI  
Autonomic Dysfunction Center,  
Division of Clinical Pharmacology,  
Departments of Medicine & Pharmacology,  
Vanderbilt University School of Medicine  
AA3228 Medical Center North, 1161 21<sup>st</sup> Avenue South  
Nashville, TN, 37232-2195, USA  
Tel. 615-343-3649 Fax 615-343-8649  
Email [satish.raj@vanderbilt.edu](mailto:satish.raj@vanderbilt.edu)

**Online Resource 1.** Copy of self-administered questionnaire to assess the gynecological symptoms and reproductive histories of vasovagal syncope patients and healthy subjects.

# Women's Health

## Patient Identifiers

Centre ID: \_\_\_\_\_ Patient ID: \_\_\_\_\_ Initials: \_\_\_\_\_

## Definitions of terms used

**Menstrual Period** A menstrual **period** refers to monthly vaginal bleeding, and normally lasts 5-9 days.

**Menstrual Cycle** A menstrual **cycle** refers to the total time between the first day of bleeding one month, until the first day of bleeding the following month. Although an average menstrual cycle is about 28 days in length, a "normal" cycle may vary from woman to woman, and from cycle to cycle. Normal cycles follow a regular pattern and are generally predictable.

**Cycle Day** Each menstrual cycle begins on the **first day of bleeding, which is defined as Cycle Day 1**. There are approximately 28 Cycle Days per menstrual cycle.

## Current Reproductive Status

- 1A. Do you currently have menstrual periods? **Yes No**
- 1B. Are currently using hormonal contraceptives such as birth control pills, injections, ring, patch, or Norplant? **Yes No**
- 1C. Have you had a hysterectomy? **Yes No**
- 1D. Have you entered menopause (last period more than 6 months ago)? **Yes No Not Sure**  
*If you answered "no" to 1D, you may skip 1E unless you are perimenopausal (early menopause, but still having periods) and you are taking hormones.*
- 1E. Are you currently using hormone replacement therapy (HRT) such as Estrace, Estraderm, PrePro, Premphase, or Premarin to relieve symptoms of menopause (such as hot-flashes, low sex-drive, vaginal dryness)? **Yes No**

## Menstrual Cycle History

If you have had a **hysterectomy, entered menopause, or you are using hormones** for contraception or relief of menopausal symptoms (such as birth control pills, injections, ring or patch, Norplant, Depo Provera, Estrace, Estraderm, Prem-Pro, Premphase, Premarin, etc.), please answer the following questions as best you can from memory and **describe what your average menstrual cycle was like BEFORE these events.**

## Menstrual Cycle: General

- 2A. How old were you when you had your first menstrual period? \_\_\_\_\_ **years**
- 2B. On **average**, how far apart are/were your periods? **Circle One**
- |                   |          |
|-------------------|----------|
| Less than 21 days | <b>0</b> |
| 22-36 days        | <b>1</b> |
| 27-31 days        | <b>2</b> |
| More than 32 days | <b>3</b> |
- 2C. How many days do/did you bleed? **Circle One**
- |                   |          |
|-------------------|----------|
| 1-2 days          | <b>0</b> |
| 3-5 days          | <b>1</b> |
| 6-9 days          | <b>2</b> |
| More than 10 days | <b>3</b> |
- 2D. Describe your normal menstrual flow on the **heaviest** days. **Circle One**
- |                                                                      |          |
|----------------------------------------------------------------------|----------|
| Light (small pads or regular tampons; change 1-3 times a day)        | <b>0</b> |
| Medium (thick pads or super tampons; change every 3-6 hours)         | <b>1</b> |
| Heavy (thick pads and/or heavy duty tampons; change every 1-3 hours) | <b>2</b> |
- 2E. How many days was blood flow the **heaviest**? **Circle One**
- |                   |          |
|-------------------|----------|
| 1-2 days          | <b>0</b> |
| 3-5 days          | <b>1</b> |
| 6-9 days          | <b>2</b> |
| More than 10 days | <b>3</b> |
- 2F. Are/were your periods regular (about the same number of days between episodes of bleeding)? **Yes No**

# Women's Health

## Patient Identifiers

Centre ID: \_\_\_\_\_ Patient ID: \_\_\_\_\_ Initials: \_\_\_\_\_

## Irregular Menstrual Bleeding

2G. Have you ever had:

|                                                           |     |    |
|-----------------------------------------------------------|-----|----|
| More than one period per month                            | Yes | No |
| Continuous spotting for more than 10 days                 | Yes | No |
| Continuous moderate to heavy flow for more than 10 days   | Yes | No |
| Skipped periods (and not pregnant)                        | Yes | No |
| Periods stopped for more than 2 months (and not pregnant) | Yes | No |

2H. How long did the irregular pattern of bleeding last?

Circle One

|                                                     |   |
|-----------------------------------------------------|---|
| Not applicable. My periods have ALWAYS been regular | 0 |
| 1 month                                             | 1 |
| 2-6 months                                          | 2 |
| 7-12 months                                         | 3 |
| More than 1 years                                   | 4 |
| My periods have NEVER been regular                  | 5 |

2I. Have any **female blood-relatives** (mother, grandmother, aunt, or sister) **EVER** had:

|                                                           |     |    |          |
|-----------------------------------------------------------|-----|----|----------|
| More than one period per month                            | Yes | No | Not Sure |
| Continuous spotting for more than 10 days                 | Yes | No | Not Sure |
| Continuous moderate to heavy flow for more than 10 days   | Yes | No | Not Sure |
| Skipped periods (and not pregnant)                        | Yes | No | Not Sure |
| Periods stopped for more than 2 months (and not pregnant) | Yes | No | Not Sure |

## Fainting and the Menstrual Cycle

2J. Do/did you feel more or less faint at different times of your menstrual cycle?

Less

N/C

More

|                                          |   |   |   |   |   |
|------------------------------------------|---|---|---|---|---|
| Menstrual (cycle day 1-5)                | 1 | 2 | 3 | 4 | 5 |
| Early Postmenstrual (cycle day 6-14)     | 1 | 2 | 3 | 4 | 5 |
| Late Postmenstrual (cycle day 15-22)     | 1 | 2 | 3 | 4 | 5 |
| Premenstrual (1-10 days before bleeding) | 1 | 2 | 3 | 4 | 5 |

2K. Please rank in which phases that you feel more faint (1=most faint; 4=least faint).

Rank

|                                          |     |
|------------------------------------------|-----|
| Menstrual (cycle day 1-5)                | ___ |
| Early Postmenstrual (cycle day 6-14)     | ___ |
| Late Postmenstrual (cycle day 15-22)     | ___ |
| Premenstrual (1-10 days before bleeding) | ___ |

## Premenstrual Syndrome (SPAF)

2L. For each premenstrual symptom below, please rate the intensity.

*To be considered "premenstrual" these symptoms must go away when bleeding starts, or very soon thereafter, and do not reappear until 1-10 days before your next period.*

None

Extreme

|                                                  |   |   |   |   |   |   |
|--------------------------------------------------|---|---|---|---|---|---|
| Breast pain, tenderness, enlargement or swelling | 1 | 2 | 3 | 4 | 5 | 6 |
| Feel unable to cope with ordinary demands        | 1 | 2 | 3 | 4 | 5 | 6 |
| Feel under stress                                | 1 | 2 | 3 | 4 | 5 | 6 |
| Irritable outbursts or bad temper                | 1 | 2 | 3 | 4 | 5 | 6 |
| Feel sad or blue                                 | 1 | 2 | 3 | 4 | 5 | 6 |
| Backache, joint and muscle pain, joint stiffness | 1 | 2 | 3 | 4 | 5 | 6 |
| Weight gain                                      | 1 | 2 | 3 | 4 | 5 | 6 |
| Abdominal heaviness, discomfort, or pain         | 1 | 2 | 3 | 4 | 5 | 6 |
| Edema, swelling, puffiness, or water retention   | 1 | 2 | 3 | 4 | 5 | 6 |
| Feeling bloated                                  | 1 | 2 | 3 | 4 | 5 | 6 |

2M. On average, how many days do you experience these symptoms?

Circle One

|                        |   |
|------------------------|---|
| 1-2 days               | 0 |
| 3-5 days               | 1 |
| 6-10 days              | 2 |
| Every day of the month | 3 |

# Women's Health

## Prevention of Syncope Trial II

### Patient Identifiers

Centre ID: \_\_\_\_\_ Patient ID: \_\_\_\_\_ Initials: \_\_\_\_\_

### Gynecological Disorders

2N. Have **you** ever been diagnosed with the following?  
*If you do not know what one is, please answer no.*

|                                                                                         |            |    |
|-----------------------------------------------------------------------------------------|------------|----|
| Anovulation                                                                             | Yes        | No |
| Dysfunctional bleeding                                                                  | Yes        | No |
| Endometriosis                                                                           | Circle One |    |
| No                                                                                      | 0          |    |
| Stage I                                                                                 | 1          |    |
| Stage II                                                                                | 2          |    |
| Stage III                                                                               | 3          |    |
| Stage IV                                                                                | 4          |    |
| Not sure                                                                                | 5          |    |
| Fibroid                                                                                 | Yes        | No |
| Galactorrhea (leakage of milk from the breast when not pregnant and not breast-feeding) | Yes        | No |
| Hirsutism (male pattern hair growth on face and/or abdomen)                             | Yes        | No |
| Hyperprolactinemia                                                                      | Yes        | No |
| Hypopituitarism                                                                         | Yes        | No |
| Infertility                                                                             | Yes        | No |
| Ovarian cyst (occasional unruptured egg sac)                                            | Yes        | No |
| Polycystic ovarian syndrome (recurrent growth of multiple immature eggs)                | Yes        | No |
| Premature menopause                                                                     | Yes        | No |
| Regular menopause                                                                       | Yes        | No |

2O. Is there a history of the following in **female blood-relatives** including your mother, grandmother, aunt or sister?

|                                                                                         |     |    |          |
|-----------------------------------------------------------------------------------------|-----|----|----------|
| Anovulation                                                                             | Yes | No | Not Sure |
| Dysfunctional bleeding                                                                  | Yes | No | Not Sure |
| Endometriosis                                                                           | Yes | No | Not Sure |
| Fibroid                                                                                 | Yes | No | Not Sure |
| Galactorrhea (leakage of milk from the breast when not pregnant and not breast-feeding) | Yes | No | Not Sure |
| Hirsutism (male pattern hair growth on face and/or abdomen)                             | Yes | No | Not Sure |
| Hyperprolactinemia                                                                      | Yes | No | Not Sure |
| Hypopituitarism                                                                         | Yes | No | Not Sure |
| Infertility                                                                             | Yes | No | Not Sure |
| Ovarian cyst (occasional unruptured egg sac)                                            | Yes | No | Not Sure |
| Polycystic ovarian syndrome (recurrent growth of multiple immature eggs)                | Yes | No | Not Sure |
| Premature menopause                                                                     | Yes | No | Not Sure |
| Regular menopause                                                                       | Yes | No | Not Sure |

# Women's Health

## Prevention of Syncope Trial II

### Patient Identifiers

Centre ID: \_\_\_\_\_ Patient ID: \_\_\_\_\_ Initials: \_\_\_\_\_

### Medication History

|                                                                                                                                                               |             |            |                 |          |             |            |
|---------------------------------------------------------------------------------------------------------------------------------------------------------------|-------------|------------|-----------------|----------|-------------|------------|
| 3A. Have you <b>ever</b> used hormonal contraceptives such as birth control pills, injections, ring or patch or Norplant?                                     | <b>Yes</b>  | <b>No</b>  |                 |          |             |            |
| 3B. Are you using these contraceptives now?                                                                                                                   | <b>Yes</b>  | <b>No</b>  |                 |          |             |            |
| 3C. Do/did you feel more or less faint when using these contraceptives?                                                                                       | <b>Less</b> | <b>N/C</b> |                 |          | <b>More</b> |            |
|                                                                                                                                                               | <b>1</b>    | <b>2</b>   | <b>3</b>        | <b>4</b> | <b>5</b>    | <b>N/A</b> |
| 3D. Have you <b>ever</b> used hormone replacement therapy (HRT) such as Estrace, Estraderm, PremPro, PremPhase, or Premarin to relieve symptoms of menopause? | <b>Yes</b>  | <b>No</b>  |                 |          |             |            |
| 3E. Are you using these hormones now?                                                                                                                         | <b>Yes</b>  | <b>No</b>  |                 |          |             |            |
| 3F. Do/did you feel less faint when using hormone replacement therapy?                                                                                        | <b>Less</b> | <b>N/C</b> |                 |          | <b>More</b> |            |
|                                                                                                                                                               | <b>1</b>    | <b>2</b>   | <b>3</b>        | <b>4</b> | <b>5</b>    | <b>N/A</b> |
| 3G. Have you ever used any "natural" or "herbal" preparations containing the following?                                                                       |             |            |                 |          |             |            |
| Black Cohash                                                                                                                                                  | <b>Yes</b>  | <b>No</b>  | <b>Not Sure</b> |          |             |            |
| Chaste Tree                                                                                                                                                   | <b>Yes</b>  | <b>No</b>  | <b>Not Sure</b> |          |             |            |
| DHEA                                                                                                                                                          | <b>Yes</b>  | <b>No</b>  | <b>Not Sure</b> |          |             |            |
| Evening Primrose Oil                                                                                                                                          | <b>Yes</b>  | <b>No</b>  | <b>Not Sure</b> |          |             |            |
| Flaxseed                                                                                                                                                      | <b>Yes</b>  | <b>No</b>  | <b>Not Sure</b> |          |             |            |
| Licorice Root                                                                                                                                                 | <b>Yes</b>  | <b>No</b>  | <b>Not Sure</b> |          |             |            |
| Soy                                                                                                                                                           | <b>Yes</b>  | <b>No</b>  | <b>Not Sure</b> |          |             |            |
| 3H. Are you using any of these "natural" or "herbal" preparations now?                                                                                        | <b>Yes</b>  | <b>No</b>  |                 |          |             |            |
| 3I. Do/did you feel more or less faint when using these "natural" or "herbal" preparations to treat menopause?                                                | <b>Less</b> | <b>N/C</b> |                 |          | <b>More</b> |            |
|                                                                                                                                                               | <b>1</b>    | <b>2</b>   | <b>3</b>        | <b>4</b> | <b>5</b>    | <b>N/A</b> |

Which preparations \_\_\_\_\_

### Fertility History

|                                                                                                                                            |             |            |                 |          |             |            |
|--------------------------------------------------------------------------------------------------------------------------------------------|-------------|------------|-----------------|----------|-------------|------------|
| 4A. Have you ever been pregnant?                                                                                                           | <b>Yes</b>  | <b>No</b>  |                 |          |             |            |
| Number of miscarriages                                                                                                                     | _____       |            |                 |          |             |            |
| Number of live births                                                                                                                      | _____       |            |                 |          |             |            |
| 4B. Did you try longer than 12 months to get pregnant (without contraception)?<br><i>If you answered "no" or "not applicable", skip C.</i> | <b>Yes</b>  | <b>No</b>  | <b>N/A</b>      |          |             |            |
| 4C. How old were you when you tried to get pregnant for more than 12 months?<br><i>If you answered "no" to A, skip to F.</i>               | _____       |            |                 |          |             |            |
| 4D. Did you have any of the following complications during pregnancy?                                                                      |             |            |                 |          |             |            |
| Gestational Diabetes                                                                                                                       | <b>Yes</b>  | <b>No</b>  |                 |          |             |            |
| High Blood Pressure                                                                                                                        | <b>Yes</b>  | <b>No</b>  |                 |          |             |            |
| Miscarriage                                                                                                                                | <b>Yes</b>  | <b>No</b>  |                 |          |             |            |
| How many <b>consecutive</b> miscarriages                                                                                                   | _____       |            |                 |          |             |            |
| Pre-eclampsia                                                                                                                              | <b>Yes</b>  | <b>No</b>  |                 |          |             |            |
| Preterm (premature) delivery                                                                                                               | <b>Yes</b>  | <b>No</b>  |                 |          |             |            |
| How many _____                                                                                                                             |             |            |                 |          |             |            |
| Vaginal Bleeding                                                                                                                           | <b>Yes</b>  | <b>No</b>  |                 |          |             |            |
| Other                                                                                                                                      | <b>Yes</b>  | <b>No</b>  |                 |          |             |            |
| Please Describe _____                                                                                                                      |             |            |                 |          |             |            |
| 4E. Do/did you feel more or less faint during pregnancy in the following time periods?                                                     | <b>Less</b> | <b>N/C</b> |                 |          | <b>More</b> |            |
| 1st Trimester (0-3 months)                                                                                                                 | <b>1</b>    | <b>2</b>   | <b>3</b>        | <b>4</b> | <b>5</b>    | <b>N/A</b> |
| 2nd Trimester (4-6 months)                                                                                                                 | <b>1</b>    | <b>2</b>   | <b>3</b>        | <b>4</b> | <b>5</b>    | <b>N/A</b> |
| 3rd Trimester (7-9 months)                                                                                                                 | <b>1</b>    | <b>2</b>   | <b>3</b>        | <b>4</b> | <b>5</b>    | <b>N/A</b> |
| 4F. Did your mother take any medications during her pregnancy with <b>you</b> to prevent miscarriage, such as DES (diethylstilbestrol)?    | <b>Yes</b>  | <b>No</b>  | <b>Not Sure</b> |          |             |            |
